# Supplementary material
Source: publisher site journal article supplement (https://www.dovepress.com/article/supplementary_file/618031/618031%20Supplementary%20Tables.docx)
Supplement: Supplementary file 1 [file 618031%20Supplementary%20Tables.docx]

| **Supplemental Table 1.** Population norms in contrast sensitivity (CSV-1000 test) for ages 50 to 75 years | | |
| --- | --- | --- |
| **Spatial Frequency (cpd)** | **Mean (log)** | **Standard Deviation** |
| 3.0 cpd | 1.56 | 0.15 |
| 6.0 cpd | 1.8 | 0.165 |
| 12.0 cpd | 1.5 | 0.15 |
| 18.0 cpd | 0.93 | 0.25 |
| Abbreviations: cpd, cycles per degree.  Population norms for VectorVision contrast sensitivity, expressed in logarithmic values, are derived from the manufacturer's standardized contrast sensitivity tests for both the CSV-1000 and CSV-2000. | | |

| **Supplemental Table 2.** Population norms in contrast sensitivity (CSV-1000 test) for ages 20 to 55 years | | |
| --- | --- | --- |
| **Spatial Frequency (cpd)** | **Mean (log)** | **Standard Deviation** |
| 3.0 cpd | 1.61 | 0.21 |
| 6.0 cpd | 1.66 | 0.23 |
| 12.0 cpd | 1.08 | 0.32 |
| Abbreviations: cpd, cycles per degree.  Population norms for VectorVision contrast sensitivity, expressed in logarithmic values, are derived from the manufacturer's standardized contrast sensitivity tests for both the CSV-1000 and CSV-2000. | | |
